# Supplementary material
Source: Springer Nature journal article supplement (https://www.springermedizin.de/resource/supplementary/12884_2011_422_MOESM1_ESM.pdf/9457674)
Supplement: MOESM1 [file 9457674]

---

**Focused antenatal care checklist**

| <b>List name</b>                                                                                      | <b>1<sup>st</sup> visit &lt;16 weeks</b> | <b>2<sup>nd</sup> visit 20-24</b> | <b>3<sup>rd</sup> visit 28-32</b> | <b>4<sup>th</sup> visit 36</b> |
|-------------------------------------------------------------------------------------------------------|------------------------------------------|-----------------------------------|-----------------------------------|--------------------------------|
|                                                                                                       |                                          | <b>weeks</b>                      | <b>weeks</b>                      | <b>weeks</b>                   |
| Process of pregnancy and its complications                                                            | ✓                                        | ✓                                 | ✓                                 | ✓                              |
| Diet and nutrition                                                                                    | ✓                                        | ✓                                 | ✓                                 | ✓                              |
| Rest and exercise in pregnancy                                                                        | ✓                                        | ✓                                 | ✓                                 | ✓                              |
| Personal hygiene                                                                                      | ✓                                        |                                   |                                   |                                |
| Danger signs in pregnancy                                                                             | ✓                                        | ✓                                 | ✓                                 | ✓                              |
| Use of drugs in pregnancy                                                                             | ✓                                        | ✓                                 | ✓                                 | ✓                              |
| Effects of STI/HIV/AIDS                                                                               | ✓                                        | ✓                                 | ✓                                 | ✓                              |
| Voluntary counselling and testing for HIV                                                             | ✓                                        |                                   |                                   |                                |
| Care of the breast and breast feeding                                                                 | ✓                                        |                                   |                                   |                                |
| Symptoms/signs of labour                                                                              |                                          |                                   | ✓                                 | ✓                              |
| Plans of delivery (emergency preparedness, place of delivery, transportation, financial arrangements) | ✓                                        | ✓                                 | ✓                                 | ✓                              |
| Plans for post partum care                                                                            |                                          |                                   | ✓                                 | ✓                              |
| Family planning                                                                                       |                                          |                                   | ✓                                 | ✓                              |
| Harmful habits (e.g smoking, drug abuse, alcoholism)                                                  | ✓                                        | ✓                                 | ✓                                 | ✓                              |
| Schedule for return visit                                                                             | ✓                                        | ✓                                 | ✓                                 | ✓                              |

---
